# Supplementary material for: ERP Evidences of Rapid Semantic Learning in Foreign Language Word Comprehension
Source: Frontiers journal article supplement (doi:10.3389/fnins.2022.763324), 2022-03-03
Supplement: Data_Sheet_1.pdf [file Data_Sheet_1.pdf]

# Supplementary Material

**Table S1.** Experimental Details

| Particulars           | Details                                   |
|-----------------------|-------------------------------------------|
| Presentation Software | Python based GUI developed by the authors |
| Monitor               | Samsung 27"                               |
| Loudspeaker           | Dell Ax210 USB Stereo                     |
| Microphone            | CAD u37                                   |

## 1 STIMULI SET

Table S2: List of highly predictable English sentences and end words in different conditions used in the experiment.

| Sentences and End words            |                            |                     |                    |                      |
|------------------------------------|----------------------------|---------------------|--------------------|----------------------|
| Sentence Prefix                    | English congruent end word | English incongruent | Japanese congruent | Japanese incongruent |
| She made the bed with clean        | bedsheets                  | swan                | mokkori            | maggu                |
| My T.V has a fifty-inch            | screen                     | van                 | gamen              | komugi               |
| The beer drinkers raised their     | mugs                       | hen                 | maggu              | mokkori              |
| Harry could see the blooming       | flowers                    | rope                | hanabana           | senro                |
| The bread was made from whole      | wheat                      | garage              | komugi             | hon                  |
| I made a phone call from a         | booth                      | bowl                | būsu               | chizu                |
| A termite looks like an            | ant                        | goalpost            | ari                | kēki                 |
| For your birthday I baked a        | cake                       | map                 | kēki               | ami                  |
| Kevin went to the library to read  | books                      | calf                | hon                | kouzui               |
| The fruit was shipped in wooden    | box                        | tablets             | hako               | hachinosu            |
| We're lost so let's look at the    | map                        | spoon               | mappu              | ari                  |
| Household goods are moved in a     | van                        | beehive             | kasha              | naifu                |
| The honey bees swarmed round the   | beehive                    | thorns              | hachinosu          | besuto               |
| I cut my finger with a             | knife                      | screen              | naifu              | nedoko               |
| The candle flame melted the        | wax                        | clock               | rou                | toge                 |
| This key won't fit in the          | lock                       | pool                | jou                | suwan                |
| The baby slept in the              | crib                       | lock                | nedoko             | rou                  |
| A rose bush has prickly            | thorns                     | pie                 | toge               | koromo               |
| Ruth poured the water down the     | sink                       | ant                 | nagashi            | genkotsu             |
| The cop wore a bullet-proof        | vest                       | jar                 | besuto             | taiko                |
| After his bath he wore a           | robe                       | bomb                | koromo             | shippu               |
| The soup was served in a           | bowl                       | cot                 | bouru              | kesshouten           |
| They marched to the beat of the    | drum                       | cloth               | doramu             | nuno                 |
| The sailor cleaned the deck of the | ship                       | broom               | senpaku            | nawa                 |
| They played a game of cat and      | mouse                      | truck               | nezumi             | torakku              |
| We shipped the furniture by        | truck                      | booth               | torakku            | supūn                |
| He tossed the drowning man a       | rope                       | crib                | rōpu               | suwan                |
| Stir your coffee with a            | spoon                      | mouse               | supūn              | kuraun               |
| At breakfast he drank apple        | juice                      | gown                | jūsu               | bouru                |
| He hit me with a clenched          | fist                       | police              | genkotsu           | oin                  |
| The king wore a golden             | crown                      | drum                | kuraun             | houki                |
| The duck swam with the white       | swan                       | ant                 | suwan              | shako                |
| Let's decide by tossing a          | coin                       | crown               | koin               | būsu                 |
| The girl swept the floor with a    | broom                      | truck               | houki              | tokei                |
| We heard the ticking of the        | clock                      | mugs                | tokei              | yakuzai              |
| The doctor prescribed the          | tablets                    | sling               | yakuzai            | medaru               |
| Unlock the door and turn the       | knob                       | flowers             | nobu               | sankakukin           |
| Her entry should win a             | medal                      | lock                | medaru             | torappu              |
| The mouse was caught in the        | trap                       | ship                | torappu            | nedoko               |

| Continuation of Table S2                              |                            |                     |                    |                      |
|-------------------------------------------------------|----------------------------|---------------------|--------------------|----------------------|
| Sentence Prefix                                       | English congruent end word | English incongruent | Japanese congruent | Japanese incongruent |
| The house was robbed by a                             | thief                      | mop                 | dorobou            | benchi               |
| Wash the floor with a                                 | mop                        | coin                | moppu              | tento                |
| Harry slept on the folding                            | cot                        | medal               | nedoko             | mendori              |
| The man is sitting on the                             | bench                      | mold                | benchi             | kouzui               |
| The heavy rains caused a                              | flood                      | bench               | kouzui             | kaeru                |
| The chicks followed the mother                        | hen                        | mat                 | mendori            | ushi                 |
| We camped out in our                                  | tent                       | juice               | tento              | hitsuji              |
| The pond was full of croaking                         | frogs                      | wheels              | kaeru              | hato                 |
| The shepherd watched his flock of                     | sheep                      | fist                | hitsuji            | mune                 |
| The swimmer dove into the                             | pool                       | cap                 | pu-ru              | gaun                 |
| The cigarette smoke filled his                        | lungs                      | bread               | mune               | ryourin              |
| The bride wore a white                                | gown                       | wheat               | koromo             | koushi               |
| We swam at the beach during high                      | tide                       | trap                | shio               | satsu                |
| A bicycle has two                                     | wheels                     | bedsheets           | ryourin            | kyappu               |
| The cow gave birth to a                               | calf                       | tent                | koushi             | pai                  |
| Paul was arrested by the                              | police                     | track               | satsu              | matto                |
| On a sunny day she wore a                             | cap                        | dove                | kyappu             | jūsu                 |
| For dessert he had apple                              | pie                        | knob                | pai                | dorobou              |
| Please wipe your feet on the                          | mat                        | ox                  | matto              | nobu                 |
| When she got out of the car she closed the            | Door                       | stars               | doa                | sakana               |
| He mailed the letter without a                        | Stamp                      | milk                | kitte              | miruku               |
| In the shower he washed his face with                 | Soap                       | plates              | sekken             | kyoukai              |
| After every meal it's good to brush your              | Teeth                      | gifts               | hanarabi           | isu                  |
| He brought his bait to the lake to catch              | Fish                       | pants               | sakana             | cha                  |
| Joan fed her baby some warm                           | Milk                       | eyes                | miruku             | taiyou               |
| Every Sunday the family goes to                       | Church                     | bank                | kyoukai            | shita                |
| The man happily sat down in the comfortable           | Chair                      | socks               | isu                | ushi                 |
| He liked lemon and sugar in his                       | Tea                        | shark               | cha                | shuzu                |
| The player's cap protected him from the               | Sun                        | nest                | taiyou             | yubiwa               |
| While eating Steve accidentally bit his               | Tongue                     | fire                | shita              | kagi                 |
| The farmer spend the morning milking his              | Cow                        | yarn                | ushi               | hikouki              |
| Susan put on the socks and                            | Shoes                      | bag                 | kutsu              | jumoku               |
| Bob proposed and gave her a diamond                   | Ring                       | kite                | yubiwa             | hoshiboshi           |
| Carolyn couldn't start her car without the right      | Keys                       | door                | kagi               |                      |
| Tim joined the Airforce as he always wanted to fly an | Aeroplane                  | stamp               | hikouki            | kaban                |
| To learn about their ancestors they drew a family     | Tree                       | fish                | jumoku             | sokkusu              |
| In the night sky it is easier to see all the          | Stars                      | church              | hoshiboshi         | omeme                |
| It was windy enough to fly a                          | Kite                       | tea                 | kaito              | ginkou               |
| The thief ran by and snatched the lady's              | Bag                        | tongue              | kaban              | doa                  |
| Derek's feet were cold, so he put on some             | Socks                      | chair               | sokkusu            | kouhan               |
| Without her sunglasses the sun hurt Annie's           | Eyes                       | cow                 | omeme              | zubon                |
| He deposited his new paycheck at the                  | Bank                       | ring                | ginkou             | sekken               |
| On her birthday she excitedly opened the              | Gifts                      | shoes               | purezento          | nesuto               |
| After dinner the maid collected the family's          | Plates                     | sun                 | kouhan             | kaji                 |
| Sid needed a belt to hold up his                      | Pants                      | fish                | zubon              | neiru                |
| The birds lay the eggs in the                         | Nest                       | teeth               | nesuto             | purezentsu           |
| Dan gathered more wood for the                        | Fire                       | aeroplane           | kaji               | kitte                |
| We had a candle-light dinner in a lakeview            | restaurant                 | camera              | restoran           | pasupoto             |
| Mary missed her company bus, so she took a            | taxi                       | passport            | takushi            | restoran             |
| She clicked the picture with a                        | camera                     | taxi                | kamera             | takushi              |
| Travelling to foreign land needs a visa and           | passport                   | restaurant          | pasupoto           | kamera               |

## 2 EXPERIMENTAL PARADIGM

The audio files of the above stimuli set is available at [https://github.com/iiscleap/eeg\\_semantics\\_stimuli](https://github.com/iiscleap/eeg_semantics_stimuli). Both English sentences and Japanese words were recorded by a multilingual speaker proficient in both languages and hence, we eliminated speaker change bias. The audio files were recorded in a noise proof sound booth with a CAD u37 microphone at a sampling rate of 44.1kHz.

The experimental paradigm of the different phases of the experiment are graphically described below.

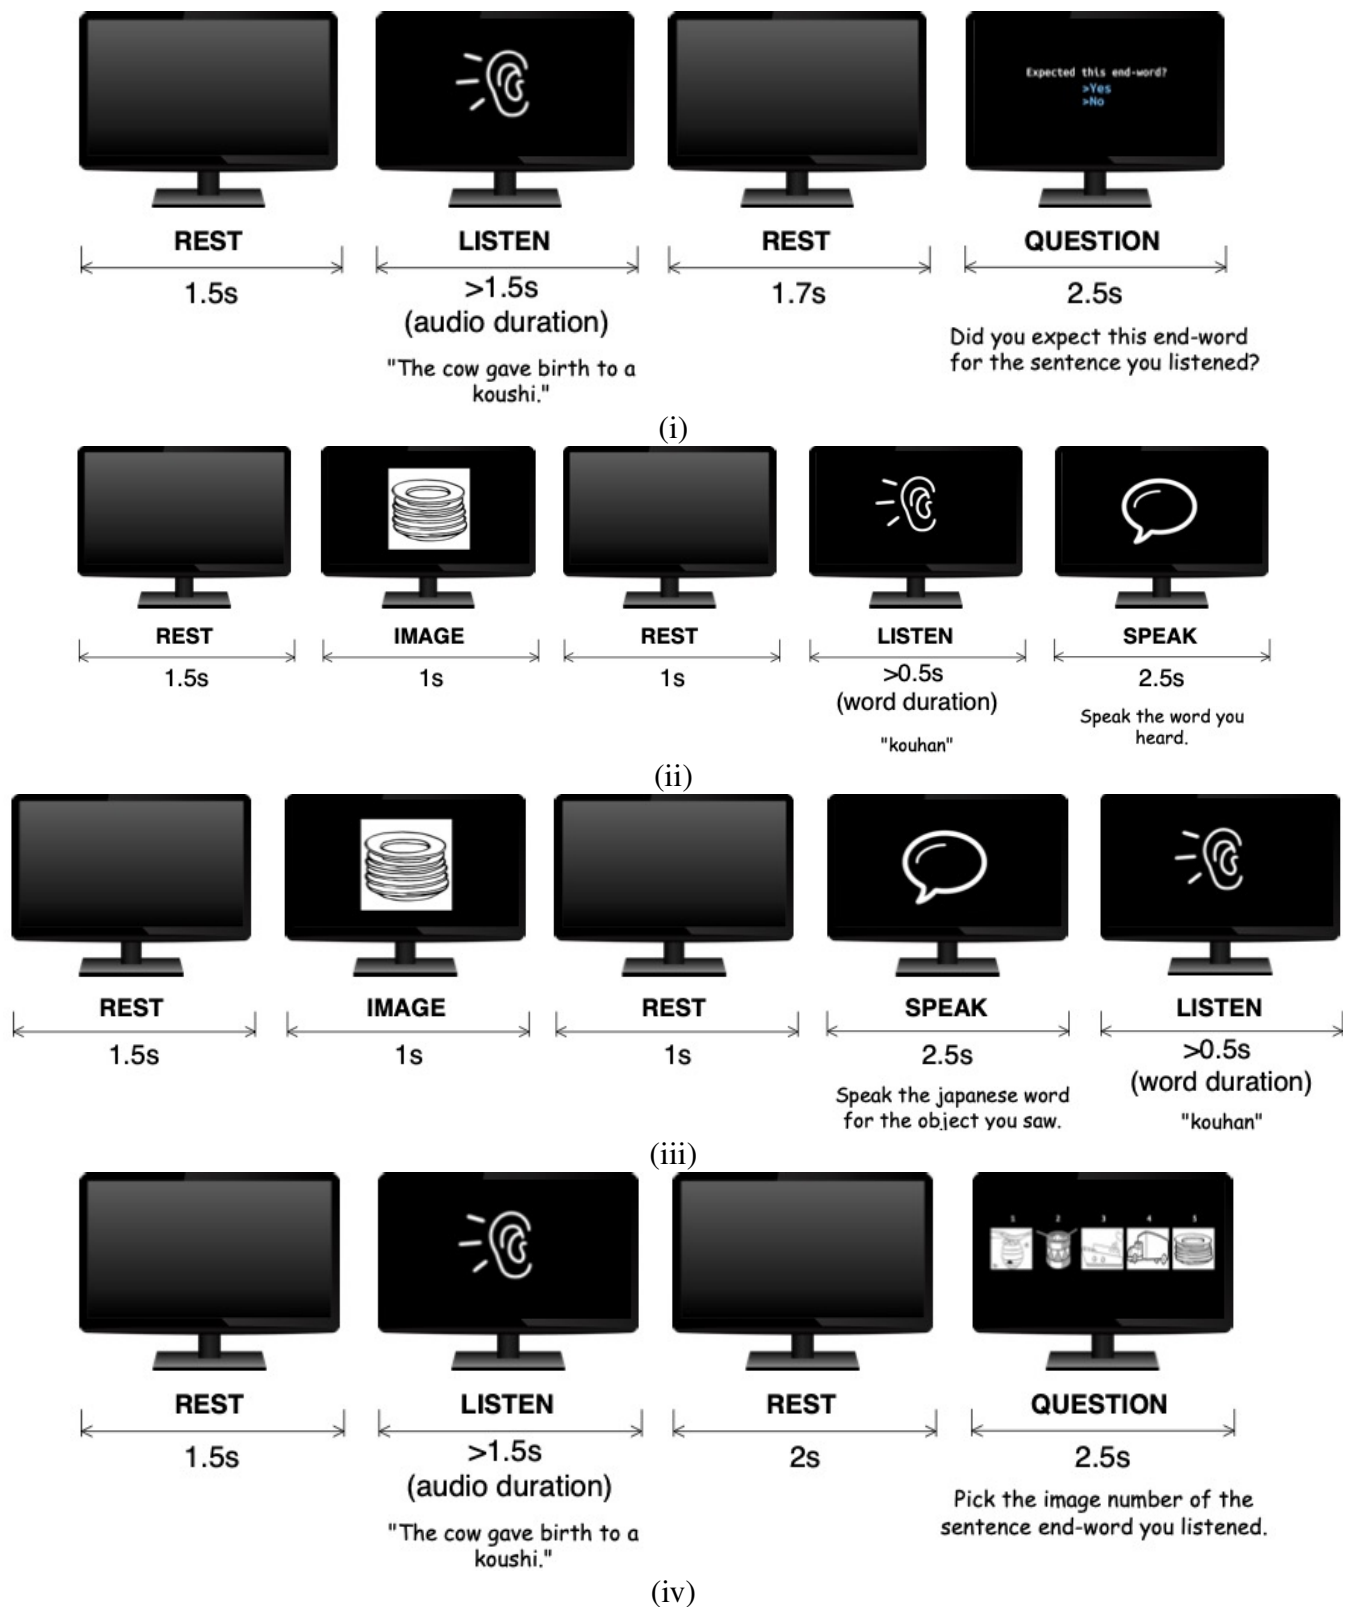

**Figure S1.** The different stages of the experiment is shown pictorially. (i) Listening Session, (ii) Learning Session, (iii) Recall Session, and (iv) Test Session. These stages are in serial order for a particular word. But as a whole, stages for different words are interspersed and randomized. (Sources of Images used in the experiment: ©pixabay.com, unsplash.com, pexels.com)

| Stimuli Condition    | Duration of End-word<br>[min. - max.] (in s) |
|----------------------|----------------------------------------------|
| English Congruent    | [0.2 - 1.1]                                  |
| English Incongruent  | [0.3 - 1.3]                                  |
| Japanese Congruent   | [0.4 - 1.3]                                  |
| Japanese Incongruent | [0.4 - 1.3]                                  |

**Table S3.** The table shows the range of duration of end-word of sentences in different stimuli conditions. Note: We used the same set of words for different conditions for a language. But the duration can vary slightly as it is spoken as part of a sentence in different instances.

### 3 KATAKANA AND HIRAGANA WORDS

Hiragana and katakana — collectively referred to by the generic term kanamoji — are both syllabic alphabets of 47 characters, each of which represents a sound. Some of the characters between the two alphabets even represent the exact same sounds and look quite similar to one another. Hiragana (phonetic sounds) are basically used for particles, words and parts of words. Katakana (phonetic sounds) are basically used for foreign/loan words.

Figure S2 shows that event related potential evoked by katakana and hiragana words before semantic exposure does not show any significant difference. Note that, a statistical significance would be highlighted as black horizontal bar in the figures. The absence of any horizontal bars means that, for all the electrodes considered here, the ERP responses for katakana and hiragana words were not statistically significantly different.

### 4 NUMBER OF SUBJECTS AND NUMBER OF TRIALS

#### 4.1 Regarding number of subjects:

The number of participants in similar studies published in literature were in the range of 15-20 participants. For example, Coulson and Wu (2005), Kutas and Federmeier (2000), Bae and Luck (2018), Schendan and Kutas (2002), Meade et al. (2018), and Kumar et al. (2021). Furthermore, Picton et al. (2000), committee report published in Society for Psychophysiological Research, suggests that the criterion for deciding the number of subjects for an ERP experiment as: “the number of subjects in an experiment must be sufficient to allow statistical tests to demonstrate the experimental effects and to support generalization of the results.” We have employed appropriate t-tests and ANOVA tests to ensure the statistical validity of the results reported. Each result in the paper is supported along with its obtained statistical power.

#### 4.2 Regarding Multiple Trials:

Every Japanese word was presented the same number of times. The number of exposures for each word is 5. The first one is during session 1 in sentence context (S1), followed by 2 exposures in isolated fashion during session 2 (S2) [learning phase] and then two exposures in S3, where the word was introduced again with a sentence context (congruent and incongruent). Each of the sessions (S1, S2, and S3) for the 90 Japanese words (and the English words used in S1) consisted of about 20 minutes of recording duration. Thus, the three sessions were recorded in an interleaved fashion in one recording setup for each of the subject. Thus, the subject did not get exposed more to katakana words than hiragana words.

### 5 CORRELATION PLOT

Let the ERP waveform for channel  $c$  for language  $l$  and for condition  $s$  be denoted as  $x_c^{s,l}(t)$  where channel  $c$  ranges from 1 – 64, language  $l$  corresponds to 1 for English and 2 for Japanese, condition  $s$  corresponds to 1 for congruent and 2 for incongruent condition. For different time regions R1-R5 (where R1 ranges from 50 – 200ms, R2 from 200 – 350ms, R3 from 350 – 500ms, R4 from 500 – 650ms and R5 from 650 – 800ms), the correlation matrix for each language  $l$  are computed using,

$$C_{R_j}^l(i, k) = \sum_{t=s_{R_j}}^{e_{R_j}} x_i^{l,1}(t) x_k^{l,2}(t)$$

where  $R_j$  corresponds to regions R1-R5 and  $s_{R_j}$  and  $e_{R_j}$  denote the start and end time instants of the region. Thus, the matrix of values  $C_{R_j}^l$  denotes the cross correlation between the ERP responses for the

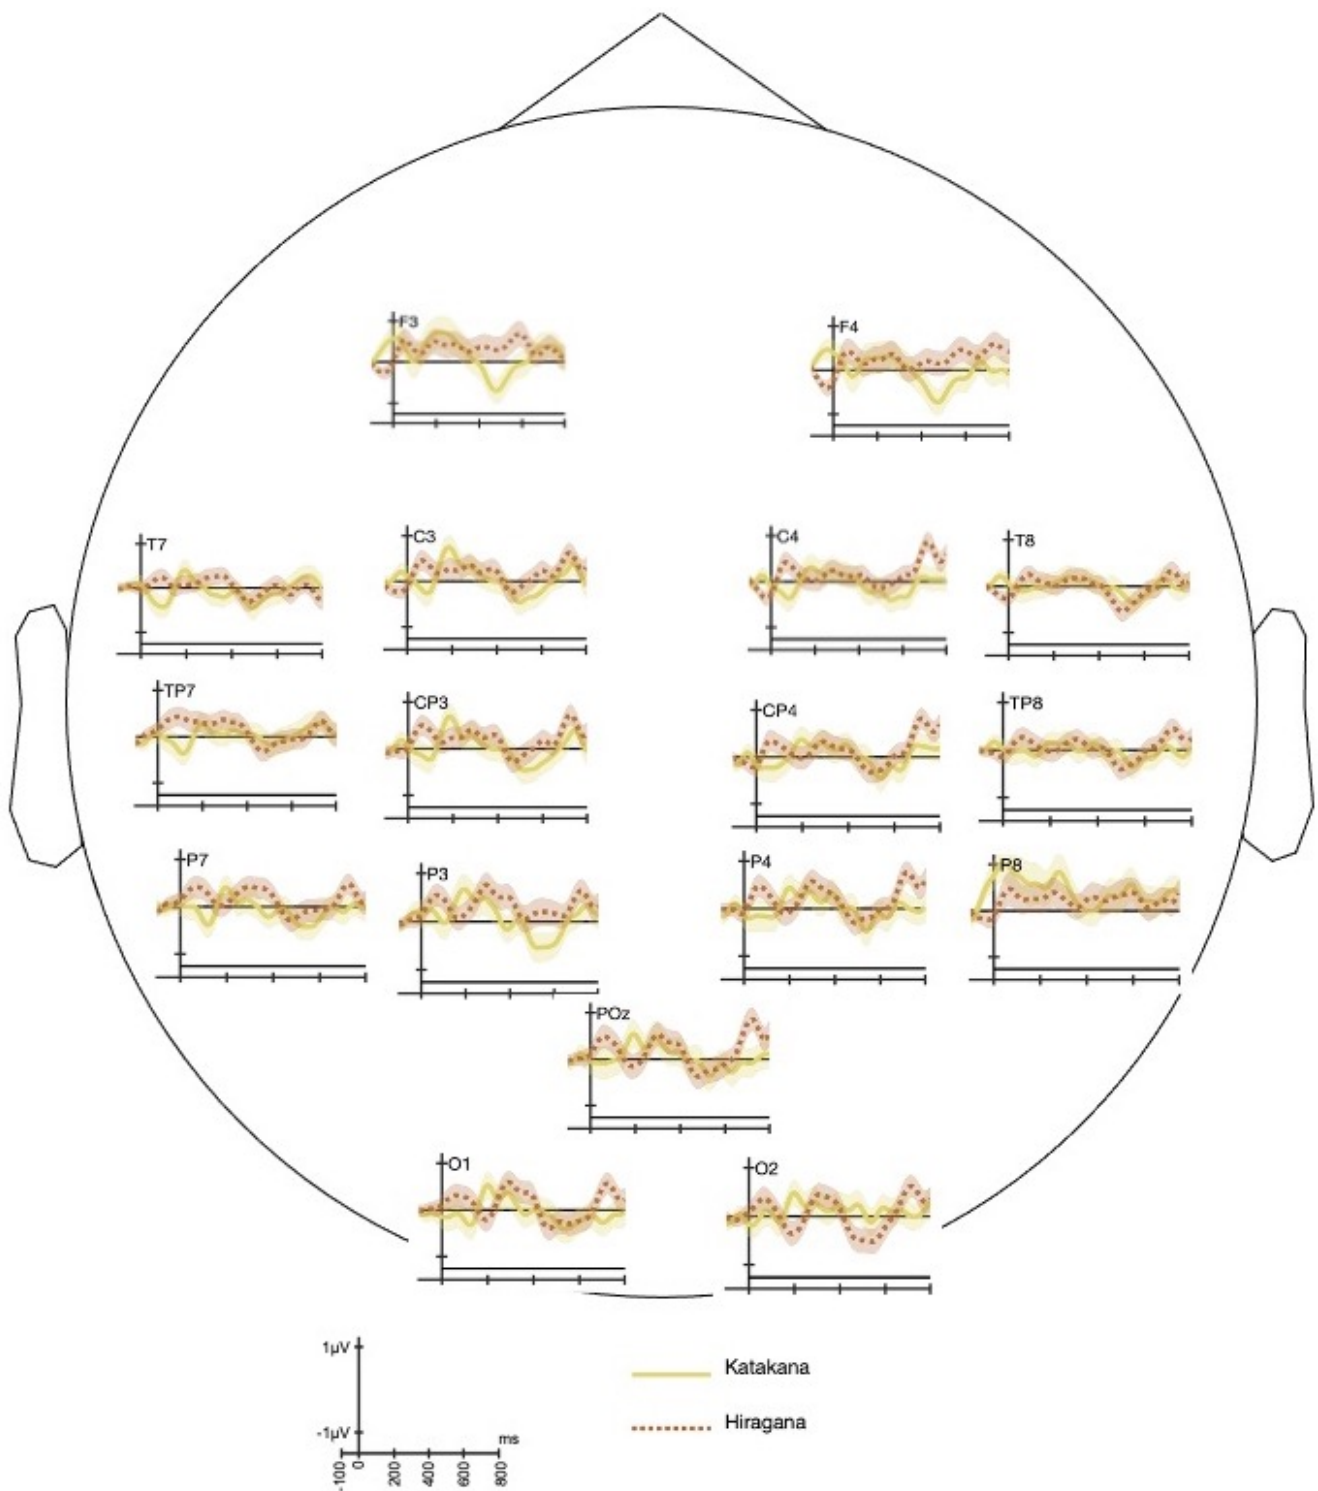

**Figure S2.** ERP plot for Katakana and Hiragana words in session 1 (before semantic exposure) of the experiment. Before knowing the meaning of the word, perception of both types of words did not show any significant difference in event related potentials. Two sample t-tests conducted did not give any time region with significant difference between the responses for two types of words (Note: If there is any significant region, that will be marked with horizontal bars below the black horizontal line at the bottom of each subplot in the figure).

congruent and incongruent condition. A high value at location  $(i, k)$  for this matrix indicates that for the channel pairs  $(i, k)$  the EEG responses to congruent and incongruent conditions are highly correlated (and time synchronized). Similarly, a low negative value indicates that for the channel pairs  $(i, k)$  the EEG responses to congruent and incongruent conditions are negatively correlated (and time synchronized). And a value for  $\mathbf{C}_{R_j}^l(i, k)$  that is close to 0 indicates that the responses to congruent and incongruent stimuli conditions are uncorrelated between channel pairs  $(i, k)$ .

For each language, these matrices are generated. A distance measure using Frobenius norm of  $\mathbf{C}^1 - \mathbf{C}^2$  is computed for every pair of time regions. This generates the  $5 \times 5$  distance matrix that is plotted in Figure 8 of the main article.

## REFERENCES

- Bae, G.-Y. and Luck, S. J. (2018). Dissociable decoding of spatial attention and working memory from eeg oscillations and sustained potentials. *Journal of Neuroscience* 38, 409–422
- Coulson, S. and Wu, Y. C. (2005). Right hemisphere activation of joke-related information: An event-related brain potential study. *Journal of cognitive neuroscience* 17, 494–506
- Kumar, M., Federmeier, K. D., and Beck, D. M. (2021). The n300: An index for predictive coding of complex visual objects and scenes. *Cerebral Cortex Communications* 2, tgab030
- Kutas, M. and Federmeier, K. D. (2000). Electrophysiology reveals semantic memory use in language comprehension. *Trends in cognitive sciences* 4, 463–470
- Meade, G., Lee, B., Midgley, K. J., Holcomb, P. J., and Emmorey, K. (2018). Phonological and semantic priming in american sign language: N300 and n400 effects. *Language, cognition and neuroscience* 33, 1092–1106
- Picton, T. W., Bentin, S., Berg, P., Donchin, E., Hillyard, S., Johnson, R., et al. (2000). Guidelines for using human event-related potentials to study cognition: recording standards and publication criteria. *Psychophysiology* 37, 127–152
- Schendan, H. E. and Kutas, M. (2002). Neurophysiological evidence for two processing times for visual object identification. *Neuropsychologia* 40, 931–945
